# Supplementary material for: The Effects of Aging on Rod Bipolar Cell Ribbon Synapses
Source: MDPI journal article supplement (doi:10.3390/cells12192385), 2023-09-29
Supplement: s1 [file s1]

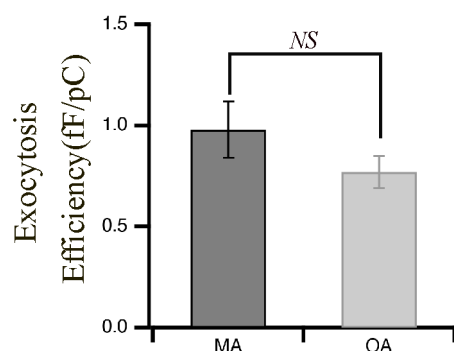

**Figure S1.** Retinal bipolar cells isolated from old-aged zebrafish exhibited no changes in their exocytosis efficiency relative to middle-aged fish. Exocytosis efficiency, obtained from the ratio of capacitance jump to  $\text{Ca}^{2+}$  current charge with pipe.

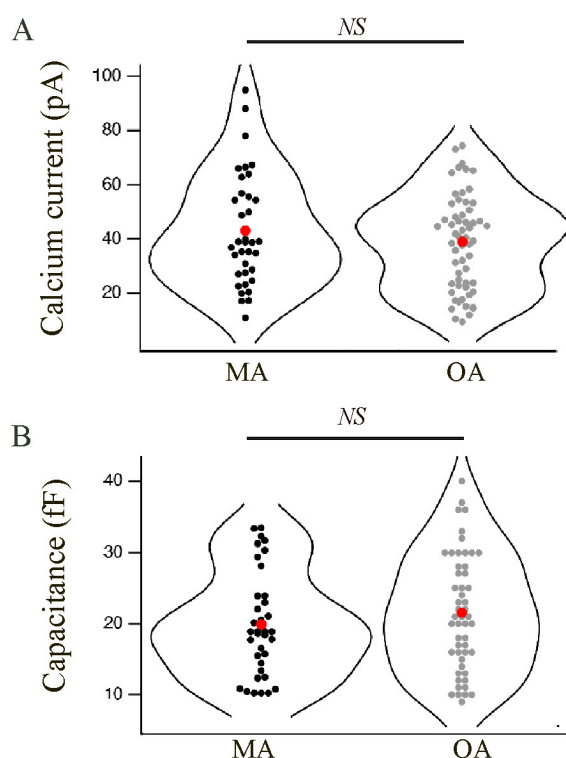

**Figure S2.** Retinal bipolar cells isolated from old-aged zebrafish exhibited no changes in their brief release properties relative to middle-aged fish. A.  $\text{Ca}^{2+}$  current (I) recorded from the synaptic terminal of a bipolar neuron isolated from middle-aged (MA, black-filled circle) and older-aged (OA, gray-filled circle) zebrafish in response to a voltage-clamp pulse (V) from  $-60$  mV to  $-15$  mV for 10 ms. Note: Each point represents individual calcium currents obtained from the same cell multiple times or different cells. The average calcium current is represented in red circles. B. Capacitance in response to a voltage-clamp pulse (V) from  $-60$  mV to  $-15$  mV for 10 ms that was obtained from bipolar neurons of MA (A, black-filled circle) and OA (B, gray-filled circle) zebrafish. Note: Each point represents individual capacitance measurements obtained from the same cell multiple times or different cells. The average capacitance measurements are represented in red circles. N= 20 MA, seven animals; N=12 OA bpcs; nine animals.
